# Supplementary material
Source: MDPI journal article supplement (https://www.mdpi.com/2079-6412/9/5/344)
Supplement: s1 [file s1]

# Supplementary Materials: In Vitro Corrosion and Bioactivity Performance of Surface-Treated Ti-20Nb-13Zr Alloys for Orthopedic Applications

Madhan Kumar Arumugam <sup>1,\*</sup>, Mohamed A. Hussein <sup>1</sup>, Akeem Yusuf Adesina <sup>1</sup> and Nasser Al-Aqeeli <sup>2,\*</sup>

<sup>1</sup> Center of Research Excellence in Corrosion, King Fahd University of Petroleum and Minerals, Dhahran 31261, Saudi Arabia; mahussein@kfupm.edu.sa (M.A.H.); adesina@kfupm.edu.sa (A.Y.A.)

<sup>2</sup> Department of Mechanical Engineering, King Fahd University of Petroleum and Minerals, Dhahran 31261, Saudi Arabia

\* Correspondence: madhankumar@kfupm.edu.sa (M.K.A.); naqeeli@kfupm.edu.sa (N.A.-A.)  
Tel.: +96-61-3860-4818 (M.K.A.)

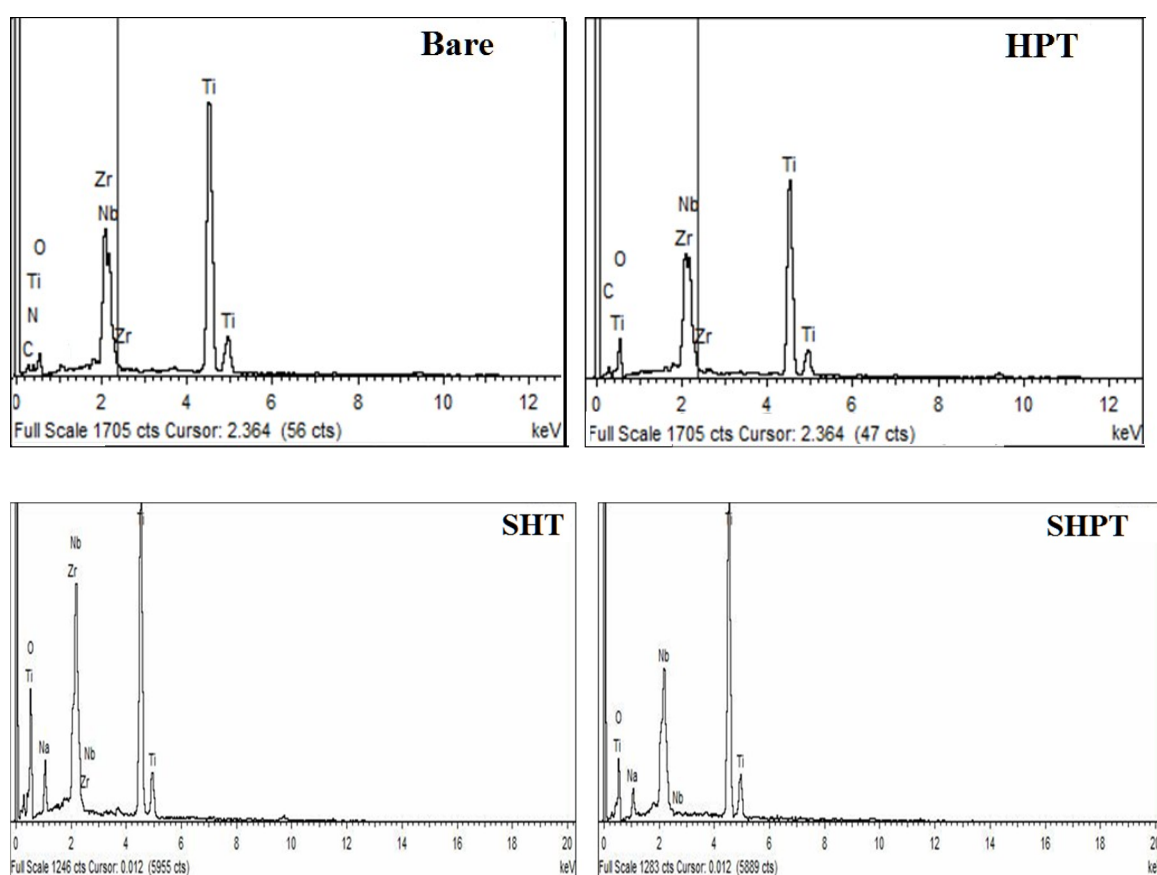

**Figure S1.** EDS analysis of bare and surface treated TNZ specimens.

**Table S1.** Surface roughness parameters of bare and treated TNZ specimens.

| Substrates | $R_a$ ( $\mu\text{m}$ ) | $R_p$ ( $\mu\text{m}$ ) | $R_q$ ( $\mu\text{m}$ ) | $R_z$ ( $\mu\text{m}$ ) | $R_v$ ( $\mu\text{m}$ ) |
|------------|-------------------------|-------------------------|-------------------------|-------------------------|-------------------------|
| Bare       | 0.173                   | 1.224                   | 0.260                   | 12.110                  | -10.280                 |
| SHT        | 0.221                   | 1.864                   | 0.279                   | 5.129                   | -3.831                  |
| HPT        | 11.346                  | 41.867                  | 14.657                  | 149.870                 | -108.012                |
| SHPT       | 2.854                   | 2.674                   | 4.010                   | 69.460                  | -42.720                 |

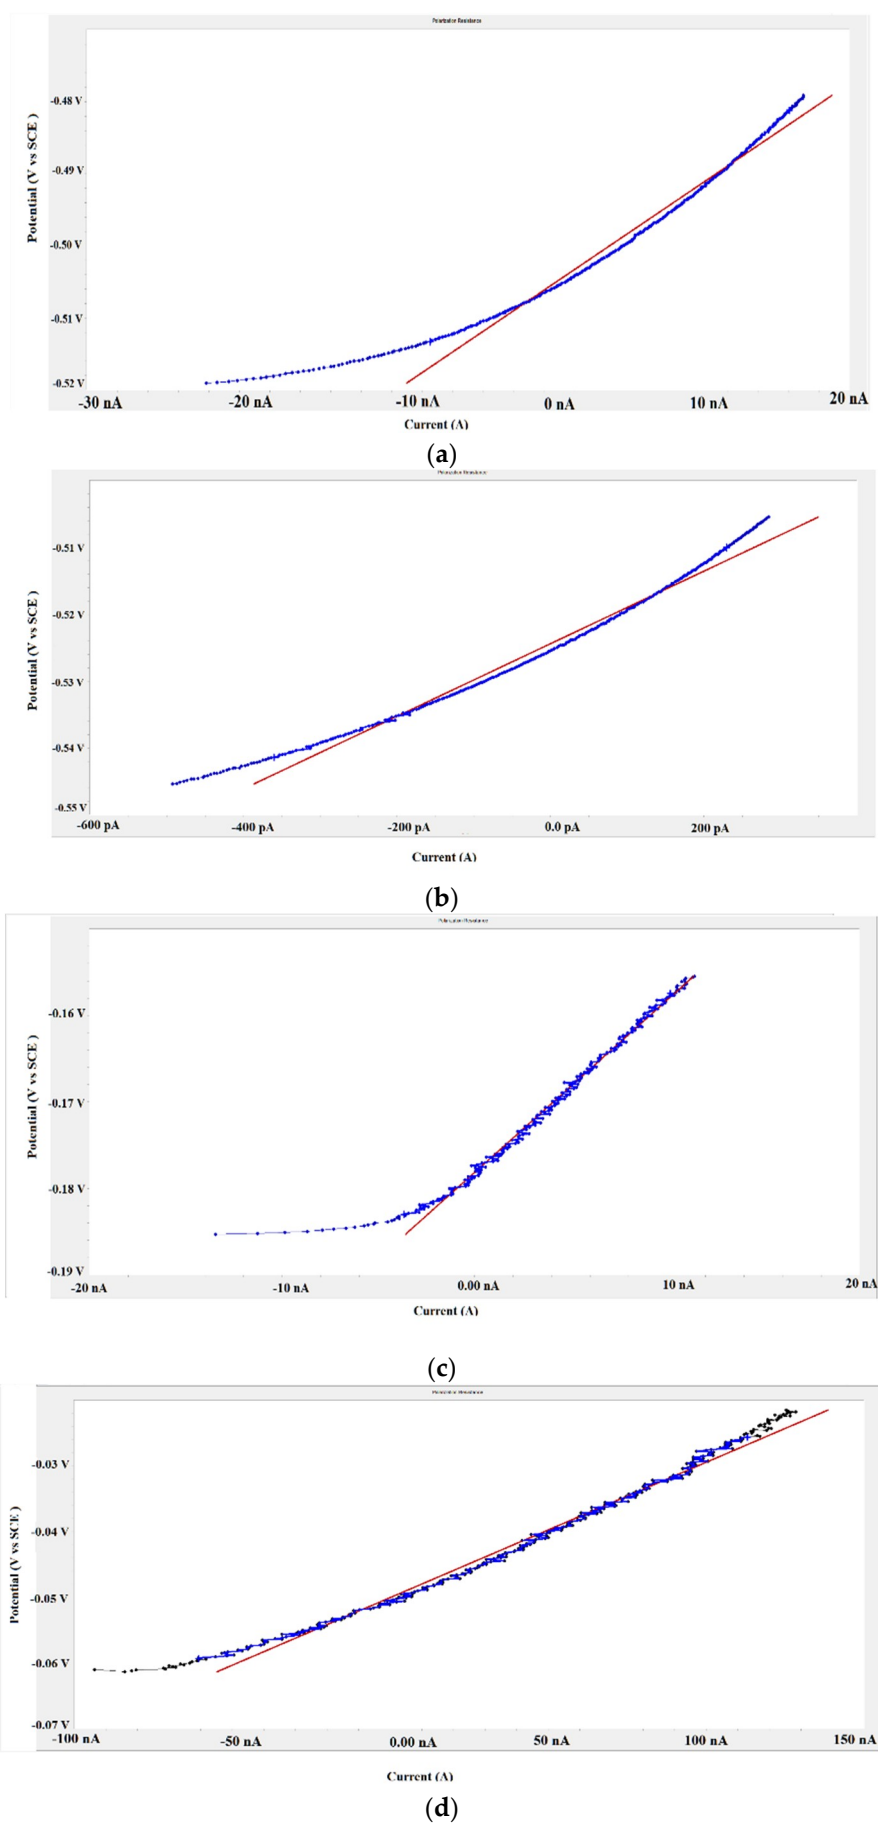

Figure S2. LPR curves of (a) Bare, (b) SHT, (c) HPT and (d) SHPT.

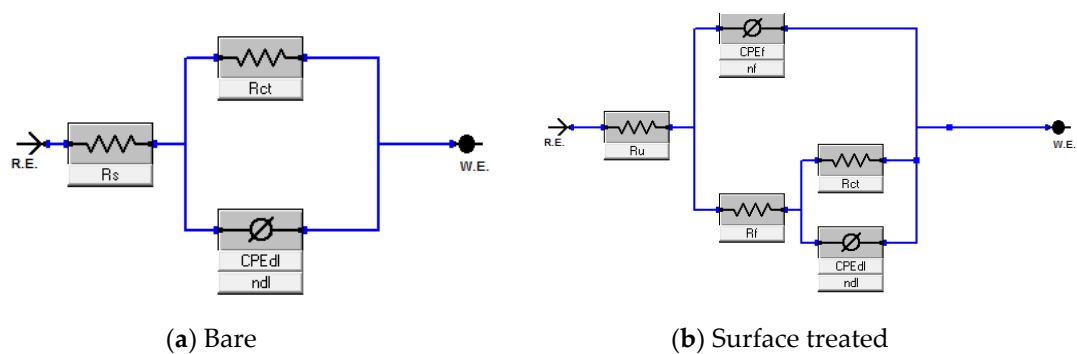

**Figure S3.** EIS circuit models of (a) Bare and (b) treated TNZ substrates.

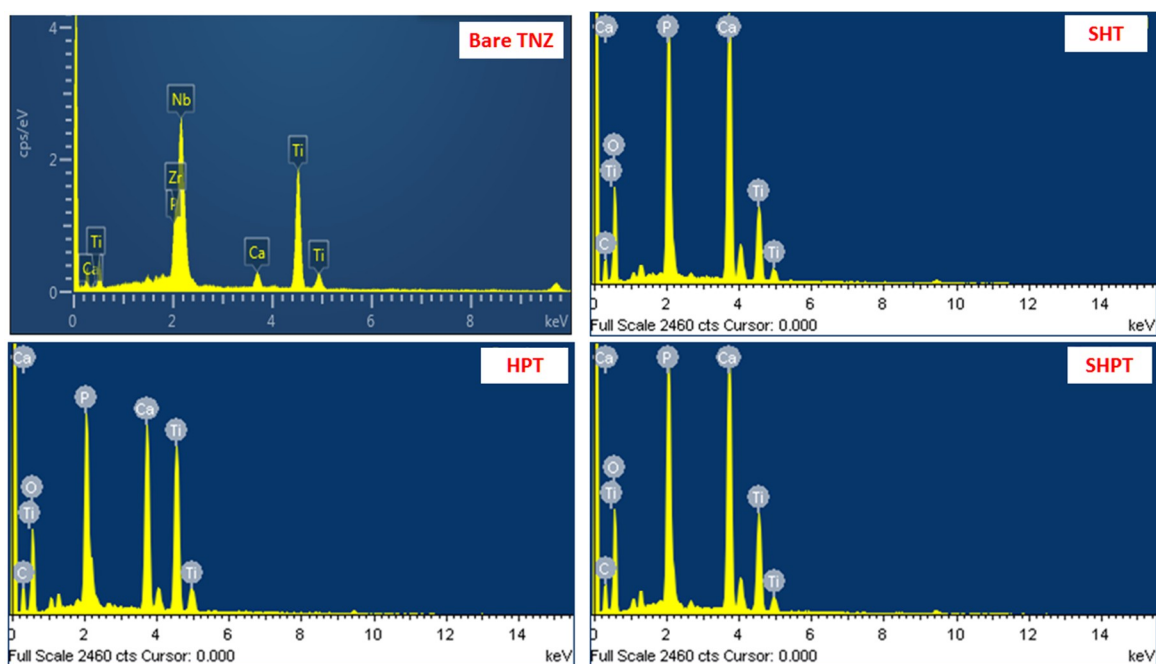

**Figure S4.** EDS results of bare and surface treated substrates.

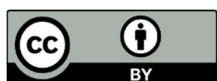

© 2019 by the authors. Submitted for possible open access publication under the terms and conditions of the Creative Commons Attribution (CC BY) license (<http://creativecommons.org/licenses/by/4.0/>).
